# Supplementary material for: Economic burden of community-acquired pneumonia among elderly patients: a Japanese perspective
Source: PubMed Central journal article supplement (PMC5715537; doi:10.1186/s41479-017-0042-1), 2017-12-05
Supplement: 41479_2017_42_MOESM1_ESM.pdf [file 41479_2017_42_MOESM1_ESM.pdf]

**Additional file 1****Table S1:** Definition of the six categories for the breakdown of total treatment costs

| Category                         | Medical fee name                | Medical fee code                       |
|----------------------------------|---------------------------------|----------------------------------------|
| Hospital charge and office visit | First visit and revisit fee     | A0                                     |
|                                  | Hospital charge                 | A1 - 4                                 |
| Drug                             | Drug fee                        | C2, D5, E3,F2, G1, H1, I1, J3, K94, L2 |
| Examination                      | Examination                     | D0 - 4                                 |
|                                  | Imaging                         | E0 - 2                                 |
|                                  | Pathological diagnosis          | N                                      |
| Medical procedure                | Medical management              | B                                      |
|                                  | Prescribing fee                 | F0, 1, 4, 5                            |
|                                  | Injection                       | G0                                     |
|                                  | Procedure                       | J0 - 2                                 |
| Others                           | In-home medical care            | C0, 1                                  |
|                                  | Medical material                | C3, D6, E4, F3, G2, J4, K95, L3        |
|                                  | Rehabilitation                  | H0                                     |
|                                  | Specialized psychiatric therapy | I0                                     |
|                                  | Surgery                         | K0 -93                                 |
|                                  | Anesthesia                      | L0, 1                                  |
|                                  | Radiation therapy               | M                                      |

**Table S2:** Definition of comorbidities and their medications

| Disease name (ICD-10)                             | Medication                                            | ATC code                   |         |
|---------------------------------------------------|-------------------------------------------------------|----------------------------|---------|
| Diabetes mellitus (E11-14)                        | Insulin lispro                                        | A10AB04                    |         |
|                                                   |                                                       | A10AC04                    |         |
|                                                   |                                                       | A10AD04                    |         |
|                                                   | Insulin aspart                                        | A10AB05                    |         |
|                                                   |                                                       | A10AD05                    |         |
|                                                   | Insulin glulisine                                     | A10AB06                    |         |
|                                                   | Insulin glargine                                      | A10AE04                    |         |
|                                                   | Insulin detemir                                       | A10AE05                    |         |
|                                                   | Insulin degludec (genetical recombination)            | A10AD06                    |         |
|                                                   | - insulin aspart (genetical recombination) mixt       |                            |         |
|                                                   | Insulin degludec                                      | A10AE06                    |         |
|                                                   | Liraglutide                                           | A10BJ02                    |         |
|                                                   | Exenatide                                             | A10BJ01                    |         |
|                                                   | Lixisenatide                                          | A10BJ03                    |         |
|                                                   | Tolbutamide                                           | A10BB03                    |         |
|                                                   | Chlorpropamide                                        | A10BB02                    |         |
|                                                   | Acetohexamide                                         | A10BB31                    |         |
|                                                   | Glycopyramide                                         | -                          |         |
|                                                   | Glibenclamide                                         | A10BB01                    |         |
|                                                   | Gliclazide                                            | A10BB09                    |         |
|                                                   | Glimepiride                                           | A10BB12                    |         |
|                                                   | Buformin hydrochloride                                | A10BA03                    |         |
|                                                   | Metformin hydrochloride                               | A10BA02                    |         |
|                                                   | Pioglitazone hydrochloride                            | A10BG03                    |         |
|                                                   | Acarbose                                              | A10BF01                    |         |
|                                                   | Voglibose                                             | A10BF03                    |         |
|                                                   | Miglitol                                              | A10BF02                    |         |
|                                                   | Nateglinide                                           | A10BX03                    |         |
|                                                   | Mitiglinide calcium hydrate                           | A10BX08                    |         |
|                                                   | Repaglinide                                           | A10BX02                    |         |
|                                                   | Sitagliptin phosphate                                 | A10BH01                    |         |
|                                                   | Vildagliptin                                          | A10BH02                    |         |
|                                                   | Alogliptin benzoate                                   | A10BH04                    |         |
|                                                   | Linagliptin                                           | A10BH05                    |         |
|                                                   | Teneligliptin hydrobromide hydrate                    | -                          |         |
|                                                   | Anagliptin                                            | -                          |         |
|                                                   | Saxagliptin hydrate                                   | A10BH03                    |         |
|                                                   | Pioglitazone - metformin mixt                         | A10BD05                    |         |
|                                                   | Pioglitazone - glimepiride mixt                       | A10BD06                    |         |
|                                                   | Mitiglinide calcium hydrate - voglibose mixt          | -                          |         |
|                                                   | Alogliptin benzoate - pioglitazone hydrochloride mixt | A10BD09                    |         |
|                                                   | Ipragliflozin L-proline                               | -                          |         |
|                                                   | Tofogliflozin                                         | -                          |         |
|                                                   | Dapagliflozin propanediol                             | A10BK01                    |         |
|                                                   | Luseogliflozin hydrate                                | -                          |         |
|                                                   | Canagliflozin                                         | A10BK02                    |         |
|                                                   | Chronic obstructive pulmonary disease (J42-44)        | Ipratropium bromide        | R03BB01 |
|                                                   |                                                       | Oxitropium bromide         | R03BB02 |
|                                                   |                                                       | Tiotropium bromide hydrate | R03BB04 |
|                                                   |                                                       | Olodaterol hydrochloride   | R03AC19 |
| Glycopyrrolate                                    |                                                       | R03BB06                    |         |
| Glycopyrronium bromide - indacaterol maleate mixt |                                                       | R03AL04                    |         |

|                                     |                                                           |         |
|-------------------------------------|-----------------------------------------------------------|---------|
|                                     | Salbutamol sulfate                                        | R03AC02 |
|                                     | Terbutaline sulfate                                       | R03AC03 |
|                                     | Procaterol hydrochloride hydrate                          | R03AC16 |
|                                     | Tulobuterol hydrochloride                                 | R03AC11 |
|                                     | Fenoterol hydrobromide                                    | R03AC04 |
|                                     | Clenbuterol hydrochloride                                 | R03AC14 |
|                                     | Salmeterol xinafoate                                      | R03AC12 |
|                                     | Salmeterol xinafoate - fluticasone propionate mixt        | R03AK06 |
|                                     | Formoterol fumarate hydrate                               | R03AC13 |
|                                     | Budesonide - formoterol fumarate dihydrate mixt           | R03AK07 |
|                                     | Fluticasone propionate - formoterol fumarate hydrate mixt | R03AK11 |
|                                     | Indacaterol maleate                                       | R03AC18 |
|                                     | Glycopyrronium bromide - indacaterol maleate mixt         | R03AL04 |
|                                     | Aminophylline hydrate                                     | R03DA05 |
|                                     | Theophylline                                              | R03DA04 |
|                                     | Fluticasone propionate                                    | R03BA05 |
|                                     | Fluticasone furoate                                       | R03BA09 |
|                                     | Salmeterol xinafoate - fluticasone propionate mixt        | R03AK06 |
|                                     | Fluticasone propionate - formoterol fumarate hydrate mixt | R03AK11 |
|                                     | Fluticasone furoate - vilanterol trifenate mixt           | R03AK10 |
|                                     | Budesonide                                                | R03BA02 |
|                                     | Budesonide - formoterol fumarate dihydrate mixt           | R03AK07 |
|                                     | Ciclesonide                                               | R03BA08 |
|                                     | Mometasone furoate hydrate                                | R03BA07 |
|                                     | Mometasone furoate                                        | R03BA07 |
| Dementia (F00)                      | Donepezil hydrochloride                                   | N06DA02 |
|                                     | Memantine hydrochloride                                   | N06DX01 |
|                                     | Galantamine hydrobromide                                  | N06DA04 |
|                                     | Rivastigmine                                              | N06DA03 |
| Rheumatism (M059, M060, M068, M069) | Penicillamine                                             | M01CC01 |
|                                     | Lobenzarit sodium                                         | -       |
|                                     | Actarit                                                   | -       |
|                                     | Bucillamine                                               | M01CC02 |
|                                     | Sulfasalazine                                             | A07EC01 |
|                                     | Methotrexate                                              | L04AX03 |
|                                     | Leflunomide                                               | L04AA13 |
|                                     | Iguratimod                                                | -       |
|                                     | Tacrolimus                                                | L04AD02 |
|                                     | Mizoribine                                                | -       |
|                                     | Tofacitinib citrate                                       | L04AA29 |
|                                     | Etanercept                                                | L04AB01 |
|                                     | Infliximab                                                | L04AB02 |
|                                     | Tocilizumab                                               | L04AC07 |
|                                     | Adalimumab                                                | L04AB04 |
|                                     | Abatacept                                                 | L04AA24 |
|                                     | Golimumab                                                 | L04AB06 |
|                                     | Certolizumab pegol                                        | L04AB05 |
|                                     | Gold sodium thiomalate                                    | M01CB01 |
|                                     | Auranofin                                                 | M01CB03 |
|                                     | Prednisolone farnesylate                                  | H02AB06 |
|                                     | Azathioprine                                              | L04AX01 |
|                                     | Methylprednisolone acetate                                | H02AB04 |
|                                     | Methylprednisolone sodium succinate                       | H02AB04 |

|                         |                                                             |         |
|-------------------------|-------------------------------------------------------------|---------|
|                         | Methylprednisolone                                          | H02AB04 |
|                         | Betamethasone acetate - betamethasone sodium phosphate mixt | -       |
|                         | Betamethasone sodium phosphate                              | H02AB01 |
|                         | Betamethasone                                               | H02AB01 |
|                         | Prednisolone sodium succinate                               | H02AB06 |
|                         | Prednisolone                                                | H02AB06 |
|                         | Hydrocortisone sodium succinate                             | H02AB09 |
|                         | Hydrocortisone                                              | H02AB09 |
|                         | Triamcinolone acetonide                                     | H02AB08 |
|                         | Triamcinolone                                               | H02AB08 |
|                         | Dexamethasone sodium phosphate                              | H02AB02 |
|                         | Dexamethasone metasulfobenzoate sodium                      | H02AB02 |
|                         | Dexamethasone palmitate                                     | H02AB02 |
|                         | Dexamethasone                                               | H02AB02 |
|                         | Cortisone acetate                                           | H02AB10 |
| Cancer (C00-99, D00-09) | Cyclophosphamide                                            | L01AA01 |
|                         | Busulfan                                                    | L01AB01 |
|                         | Melphalan                                                   | L01AA03 |
|                         | Estramustine phosphate sodium hydrate                       | L01XX11 |
|                         | Temozolomide                                                | L01AX03 |
|                         | Mercaptopurine                                              | L01BB02 |
|                         | Methotrexate                                                | L01BA01 |
|                         | Tegafur                                                     | L01BC03 |
|                         | Fluorouracil                                                | L01BC02 |
|                         | Doxifluridine                                               | -       |
|                         | Capecitabine                                                | L01BC06 |
|                         | Cytarabine ocfosphate hydrate                               | L01BC01 |
|                         | Hydroxyurea                                                 | L01XX05 |
|                         | Fludarabine phosphate                                       | L01BB05 |
|                         | Tegafur - uracil mixt                                       | L01BC53 |
|                         | Tegafur - gimeracil - oteracil potassium mixt               | L01BC53 |
|                         | Etoposide                                                   | L01CB01 |
|                         | Procarbazine hydrochloride                                  | L01XB01 |
|                         | Tamoxifen citrate                                           | L02BA01 |
|                         | Sobuzoxane                                                  | -       |
|                         | Flutamide                                                   | L02BB01 |
|                         | Tretinoin                                                   | L01XX14 |
|                         | Toremifene citrate                                          | L02BA02 |
|                         | Bicalutamide                                                | L02BB03 |
|                         | Anastrozole                                                 | L02BG03 |
|                         | Imatinib mesylate                                           | L01XE01 |
|                         | Exemestane                                                  | L02BG06 |
|                         | Gefitinib                                                   | L01XE02 |
|                         | Tamibarotene                                                | -       |
|                         | Letrozole                                                   | L02BG04 |
|                         | Erlotinib hydrochloride                                     | L01XE03 |
|                         | Sorafenib tosylate                                          | L01XE05 |
|                         | Sunitinib malate                                            | L01XE04 |
|                         | Thalidomide                                                 | L04AX02 |
|                         | Dasatinib                                                   | L01XE06 |
|                         | Nilotinib hydrochloride hydrate                             | L01XE08 |
|                         | Lapatinib ditosylate                                        | L01XE07 |
|                         | Everolimus                                                  | L01XE10 |
|                         | Lenalidomide hydrate                                        | L04AX04 |
|                         | Vorinostat                                                  | L01XX38 |

|                                             |         |
|---------------------------------------------|---------|
| Crizotinib                                  | L01XE16 |
| Axitinib                                    | L01XE17 |
| Pazopanib hydrochloride                     | L01XE11 |
| Regorafenib hydrate                         | L01XE21 |
| Afatinib dimaleate                          | L01XE13 |
| Enzalutamide                                | L02BB04 |
| Alectinib hydrochloride                     | L01XE36 |
| Abiraterone acetate                         | L02BX03 |
| Ruxolitinib phosphate                       | L01XE18 |
| Sirolimus                                   | L04AA10 |
| Bosutinib hydrate                           | L01XE14 |
| Vemurafenib                                 | L01XE15 |
| Pomalidomide                                | L04AX06 |
| Lenvatinib mesylate                         | L01XE29 |
| Panobinostat lactate                        | L01XX42 |
| Vandetanib                                  | L01XE12 |
| Coriolus versicolor polysaccharide          | -       |
| Ubenimex                                    | -       |
| Anagrelide hydrochloride hydrate            | L01XX35 |
| Trifluridine - tipiracil hydrochloride mixt | L01BC59 |
| Carmustine                                  | L01AD01 |
| Tegafur                                     | L01BC03 |
| Fluorouracil                                | L01BC02 |
| Bleomycin sulfate                           | L01DC01 |
| Cyclophosphamide                            | L01AA01 |
| Ifosfamide                                  | L01AA06 |
| Busulfan                                    | L01AB01 |
| Nimustine hydrochloride                     | L01AD06 |
| Dacarbazine                                 | L01AX04 |
| Ranimustine                                 | L01AD07 |
| Melphalan                                   | L01AA03 |
| Temozolomide                                | L01AX03 |
| Bendamustine hydrochloride                  | L01AA09 |
| Streptozocin                                | L01AD04 |
| Enocitabine                                 | -       |
| Gemcitabine hydrochloride                   | L01BC05 |
| Cytarabine                                  | L01BC01 |
| Fludarabine phosphate                       | L01BB05 |
| Pemetrexed sodium hydrate                   | L01BA04 |
| Nelarabine                                  | L01BB07 |
| Clofarabine                                 | L01BB06 |
| Mitomycin                                   | L01DC03 |
| Dactinomycin                                | L01DA01 |
| Bleomycin hydrochloride                     | L01DC01 |
| Peplomycin sulfate                          | -       |
| Aclarubicin hydrochloride                   | L01DB04 |
| Daunorubicin hydrochloride                  | L01DB02 |
| Doxorubicin hydrochloride                   | L01DB01 |
| Pirarubicin hydrochloride                   | L01DB08 |
| Epirubicin hydrochloride                    | L01DB03 |
| Idarubicin hydrochloride                    | L01DB06 |
| Amrubicin hydrochloride                     | L01DB10 |
| Gemtuzumab ozogamicin                       | L01XC05 |
| Vincristine sulfate                         | L01CA02 |
| Vinblastine sulfate                         | L01CA01 |
| Vindesine sulfate                           | L01CA03 |

|                                       |         |
|---------------------------------------|---------|
| Irinotecan hydrochloride              | L01XX19 |
| Docetaxel                             | L01CD02 |
| Paclitaxel                            | L01CD01 |
| Vinorelbine tartrate                  | L01CA04 |
| Nogitecan hydrochloride               | L01XX17 |
| Cabazitaxel acetate                   | L01CD04 |
| Asparaginase                          | L01XX02 |
| Cisplatin                             | L01XA01 |
| Mitoxantrone hydrochloride            | L01DB07 |
| Carboplatin                           | L01XA02 |
| Pentostatin                           | L01XX08 |
| Nedaplatin                            | -       |
| Trastuzumab (genetical recombination) | L01XC03 |
| Rituximab                             | L01XC02 |
| Cladribine                            | L01BB04 |
| Arsenic trioxide                      | L01XX27 |
| Oxaliplatin                           | L01XA03 |
| Bortezomib                            | L01XX32 |
| Bevacizumab                           | L01XX32 |
| Ibritumomab tiuxetan                  | V10XX02 |
| Cetuximab                             | L01XC06 |
| Miriplatin hydrate                    | -       |
| Panitumumab                           | L01XC08 |
| Temsirolimus                          | L01XE09 |
| Azacitidine                           | L01BC07 |
| Eribulin mesylate                     | L01XX41 |
| Fulvestrant                           | L02BA03 |
| Mogamulizumab                         | L01XC25 |
| Ofatumumab                            | L01XC10 |
| Pertuzumab                            | L01XC13 |
| Trastuzumab emtansine                 | L01XC14 |
| Nivolumab                             | L01XC17 |
| Alemtuzumab                           | L04AA34 |
| Ramucirumab                           | L01XC21 |
| Ipilimumab                            | L01XC11 |
| Trabectedin                           | L01CX01 |
| Picibanil                             | -       |
| Lentinan                              | L03AX01 |
| Porfimer sodium                       | L01XD01 |
| Talaporfin sodium                     | -       |
| Talc                                  | -       |

---

**Table S3:** Definition of drug use

| Therapeutic category                     | Generic name                                    | ATC code |
|------------------------------------------|-------------------------------------------------|----------|
| Oral antibiotics                         | Cortisone                                       | H02AB10  |
|                                          | Hydrocortisone                                  | H02AB09  |
|                                          | Fludrocortisone                                 | H02AA02  |
|                                          | Prednisolone                                    | H02AB06  |
|                                          | Methylprednisolone                              | H02AB04  |
|                                          | Triamcinolone                                   | H02AB08  |
|                                          | Dexamethasone                                   | H02AB02  |
|                                          | Betamethasone                                   | H02AB01  |
| Inhaled steroids                         | Beclometasone                                   | R01AD01  |
|                                          | Fluticasone                                     | R03BA05  |
|                                          | Salmeterol and fluticasone                      | R03AK06  |
|                                          | Formoterol and fluticasone                      | R03AK11  |
|                                          | Vilanterol and fluticasone furoate              | R03AK10  |
|                                          | Budesonide                                      | R03BA02  |
|                                          | Formoterol and budesonide                       | R03AK07  |
|                                          | Ciclesonide                                     | R03BA08  |
| Mometasone                               | R03BA07                                         |          |
| Angiotensin-converting enzyme inhibitors | Captopril                                       | C09AA01  |
|                                          | Enalapril                                       | C09AA02  |
|                                          | Alacepril                                       | -        |
|                                          | Delapril                                        | C09AA12  |
|                                          | Cilazapril                                      | C09AA08  |
|                                          | Lisinopril                                      | C09AA03  |
|                                          | Benazepril                                      | C09AA07  |
|                                          | Imidapril                                       | C09AA16  |
|                                          | Temocapril                                      | C09AA14  |
|                                          | Quinapril                                       | C09AA06  |
|                                          | Trandolapril                                    | C09AA10  |
|                                          | Perindopril                                     | C09AA04  |
| Statins                                  | Pravastatin                                     | C10AA03  |
|                                          | Simvastatin                                     | C10AA01  |
|                                          | Fluvastatin                                     | C10AA04  |
|                                          | Atorvastatin                                    | C10AA05  |
|                                          | Pitavastatin                                    | C10AA08  |
|                                          | Rosuvastatin                                    | C10AA07  |
|                                          | Amlodipine besilate - atorvastatin calcium mixt | C10BX03  |

**Table S4:** The median treatment costs and treatment period, and death rate of invasive pneumococcal disease (IPD)

| IPD*                                  | n   | %   | Median    |                           |                                        | Death (%) |
|---------------------------------------|-----|-----|-----------|---------------------------|----------------------------------------|-----------|
|                                       |     |     | Median    | ( 25%tile - 75%tile )     | treatment period ( 25%tile - 75%tile ) |           |
| Total                                 | 263 | -   | 864,405   | ( 490,890 - 1,420,456 )   | 21 ( 11 - 40 )                         | 35%       |
| Sex                                   |     |     |           |                           |                                        |           |
| Men                                   | 177 | 67% | 846,658   | ( 484,008 - 1,420,456 )   | 21 ( 10 - 40 )                         | 34%       |
| Female                                | 86  | 33% | 890,625   | ( 518,805 - 1,420,037 )   | 19 ( 12 - 39 )                         | 35%       |
| Age                                   |     |     |           |                           |                                        |           |
| 65-74                                 | 63  | 24% | 919,922   | ( 478,085 - 1,420,037 )   | 17 ( 10 - 38 )                         | 32%       |
| 75-84                                 | 111 | 42% | 934,653   | ( 525,765 - 1,796,859 )   | 23 ( 11 - 43 )                         | 35%       |
| 85-                                   | 89  | 34% | 789,909   | ( 433,733 - 1,208,130 )   | 21 ( 10 - 37 )                         | 36%       |
| Death                                 | 91  | 35% | 1,182,284 | ( 582,960 - 1,956,972 )   | 24 ( 9 - 41 )                          | -         |
| Risk factor                           |     |     |           |                           |                                        |           |
| Diabetes mellitus                     | 50  | 19% | 953,863   | ( 525,765 - 1,396,733 )   | 27 ( 13 - 41 )                         | 34%       |
| Chronic obstructive pulmonary disease | 32  | 12% | 1,115,365 | ( 541,494 - 2,191,297 )   | 24 ( 15 - 48 )                         | 41%       |
| Dementia                              | 5   | 2%  | 846,658   | ( 740,062 - 1,559,037 )   | 22 ( 12 - 25 )                         | 40%       |
| Dialysis                              | 10  | 4%  | 2,237,032 | ( 1,300,203 - 2,433,761 ) | 44 ( 27 - 61 )                         | 20%       |
| Liver dysfunction                     | 59  | 22% | 936,221   | ( 572,568 - 1,398,894 )   | 25 ( 15 - 42 )                         | 27%       |
| Rheumatism                            | 10  | 4%  | 634,026   | ( 402,898 - 1,239,441 )   | 15 ( 10 - 33 )                         | 10%       |



|                      |                                         |        |     |           |                         |                         |                       |           |
|----------------------|-----------------------------------------|--------|-----|-----------|-------------------------|-------------------------|-----------------------|-----------|
|                      | Cancer                                  | 26     | 10% | 724,598   | ( 420,207 - 1,301,421 ) | 23                      | ( 10 - 35 )           | 38%       |
| <b>Prescription</b>  |                                         |        |     |           |                         |                         |                       |           |
|                      | Oral steroid                            | 39     | 15% | 919,922   | ( 573,590 - 1,485,356 ) | 21                      | ( 12 - 35 )           | 41%       |
|                      | Inhaled steroid                         | 12     | 5%  | 814,616   | ( 487,449 - 1,674,051 ) | 19                      | ( 13 - 26 )           | 33%       |
|                      | Angiotensin-converting enzyme inhibitor | 15     | 6%  | 678,229   | ( 433,733 - 1,249,058 ) | 16                      | ( 10 - 67 )           | 53%       |
|                      | Statin                                  | 27     | 10% | 592,603   | ( 433,733 - 1,300,203 ) | 15                      | ( 10 - 27 )           | 37%       |
| <b>A-DROP system</b> |                                         |        |     |           |                         |                         |                       |           |
|                      | Score0                                  | 6      | 2%  | 798,517   | ( 421,621 - 1,376,402 ) | 21                      | ( 10 - 66 )           | 33%       |
|                      | Score1                                  | 30     | 11% | 607,963   | ( 390,312 - 875,273 )   | 14                      | ( 10 - 21 )           | 20%       |
|                      | Score2                                  | 45     | 17% | 684,022   | ( 442,720 - 1,025,908 ) | 15                      | ( 10 - 31 )           | 24%       |
|                      | Score3                                  | 46     | 17% | 794,514   | ( 536,953 - 1,208,130 ) | 18                      | ( 12 - 33 )           | 26%       |
|                      | Score4                                  | 15     | 6%  | 864,405   | ( 321,850 - 1,420,456 ) | 15                      | ( 4 - 35 )            | 60%       |
|                      | Score5                                  | 20     | 8%  | 1,031,698 | ( 580,013 - 1,906,766 ) | 24                      | ( 7 - 40 )            | 65%       |
| <b>Non-IPD</b>       |                                         |        |     |           |                         |                         |                       |           |
|                      |                                         | n      | %   | Median    | ( 25%tile - 75%tile )   | Median treatment period | ( 25%tile - 75%tile ) | Death (%) |
|                      | Total                                   | 20,051 | -   | 537,718   | ( 367,713 - 846,159 )   | 14                      | ( 9 - 25 )            | 11%       |
| <b>Sex</b>           |                                         |        |     |           |                         |                         |                       |           |
|                      | Men                                     | 12,137 | 61% | 534,257   | ( 364,460 - 844,836 )   | 14                      | ( 9 - 24 )            | 12%       |
|                      | Female                                  | 7,914  | 39% | 542,651   | ( 372,745 - 849,333 )   | 15                      | ( 10 - 25 )           | 11%       |
| <b>Age</b>           |                                         |        |     |           |                         |                         |                       |           |
|                      | 65-74                                   | 4,436  | 22% | 489,800   | ( 342,244 - 763,288 )   | 12                      | ( 9 - 20 )            | 7%        |

|                      |                                         |       |     |         |                         |    |             |     |
|----------------------|-----------------------------------------|-------|-----|---------|-------------------------|----|-------------|-----|
|                      | 75-84                                   | 7,854 | 39% | 532,321 | ( 368,579 - 846,836 )   | 14 | ( 9 - 24 )  | 10% |
|                      | 85-                                     | 7,761 | 39% | 574,988 | ( 383,921 - 887,538 )   | 16 | ( 10 - 28 ) | 16% |
| <b>Death</b>         |                                         | 2,298 | 11% | 711,031 | ( 371,484 - 1,161,827 ) | 16 | ( 7 - 35 )  | -   |
| <b>Risk factor</b>   |                                         |       |     |         |                         |    |             |     |
|                      | Diabetes mellitus                       | 1,982 | 10% | 544,691 | ( 373,956 - 863,259 )   | 15 | ( 10 - 25 ) | 10% |
|                      | Chronic obstructive pulmonary disease   | 2,477 | 12% | 539,722 | ( 376,853 - 806,698 )   | 14 | ( 9 - 22 )  | 10% |
|                      | Dementia                                | 130   | 1%  | 610,415 | ( 348,911 - 961,158 )   | 18 | ( 11 - 33 ) | 18% |
|                      | Dialysis                                | 372   | 2%  | 708,298 | ( 443,195 - 1,127,676 ) | 15 | ( 10 - 27 ) | 15% |
|                      | Liver dysfunction                       | 2,714 | 14% | 527,049 | ( 363,135 - 827,768 )   | 14 | ( 9 - 24 )  | 12% |
|                      | Rheumatism                              | 479   | 2%  | 546,507 | ( 381,025 - 875,446 )   | 15 | ( 10 - 27 ) | 11% |
|                      | Cancer                                  | 1,296 | 6%  | 504,013 | ( 337,873 - 823,538 )   | 14 | ( 9 - 23 )  | 15% |
| <b>Prescription</b>  |                                         |       |     |         |                         |    |             |     |
|                      | Oral steroid                            | 1,547 | 8%  | 536,393 | ( 369,636 - 833,278 )   | 14 | ( 9 - 24 )  | 13% |
|                      | Inhaled steroid                         | 1,143 | 6%  | 521,174 | ( 363,135 - 769,968 )   | 13 | ( 9 - 21 )  | 8%  |
|                      | Angiotensin-converting enzyme inhibitor | 571   | 3%  | 571,941 | ( 386,059 - 899,597 )   | 15 | ( 10 - 26 ) | 9%  |
|                      | Statin                                  | 1,556 | 8%  | 526,283 | ( 368,144 - 803,272 )   | 14 | ( 9 - 23 )  | 7%  |
| <b>A-DROP system</b> |                                         |       |     |         |                         |    |             |     |
|                      | Score0                                  | 1,000 | 5%  | 389,196 | ( 297,711 - 541,816 )   | 10 | ( 8 - 15 )  | 2%  |
|                      | Score1                                  | 5,484 | 27% | 454,057 | ( 325,683 - 656,689 )   | 12 | ( 9 - 18 )  | 4%  |
|                      | Score2                                  | 5,599 | 28% | 522,740 | ( 377,431 - 775,406 )   | 13 | ( 9 - 22 )  | 8%  |
|                      | Score3                                  | 3,341 | 17% | 624,617 | ( 434,094 - 958,233 )   | 16 | ( 10 - 27 ) | 15% |

|        |       |    |         |   |         |   |           |   |    |   |    |   |    |   |     |
|--------|-------|----|---------|---|---------|---|-----------|---|----|---|----|---|----|---|-----|
| Score4 | 1,111 | 6% | 686,770 | ( | 439,941 | - | 1,018,905 | ) | 17 | ( | 10 | - | 29 | ) | 35% |
| Score5 | 234   | 1% | 723,190 | ( | 399,341 | - | 1,208,718 | ) | 18 | ( | 7  | - | 35 | ) | 51% |

---

\*IPD: invasive pneumococcal disease
